# Supplementary material for: Atomic-interface strategy and N,O co-doping enable WS2 electrodes with ultrafast ion transport rate in sodium-ion batteries
Source: Royal Society of Chemistry journal article supplement (doi:10.1039/d2ta04984h), 2022-01-01
Supplement: d2ta04984h1.pdf [file d2ta04984h1.pdf]

**Atomic-interface strategy and N,O codoping enable WS<sub>2</sub> electrodes with ultrafast ion transport rate in sodium-ion batteries**

Meisheng Han, Yongbiao Mu, Yuanyuan Cai, Lei Wei, Lin Zeng\*, Tianshou Zhao\*

Shenzhen Key Laboratory of Advanced Energy Storage, Southern University of Science and Technology, Shenzhen 518055, China

SUSTech Energy Institute for Carbon Neutrality, Southern University of Science and Technology, Shenzhen 518055, China

Department of Mechanical and Energy Engineering, Southern University of Science and Technology, Shenzhen 518055, China

\*Corresponding Author.

E-mail address: zhaots@sustech.edu.cn (T.S. Zhao); zengl3@sustech.edu.cn (L. Zeng)

## **Experimental section**

### ***Synthesis of samples***

The DMF and  $(\text{NH}_4)_2\text{WS}_4$  was mixed in the self-made vessels in a distinct amount. Various  $\text{WS}_2/\text{C}$  examples were obtained by varying the proportion of DMF/ $(\text{NH}_4)_2\text{WS}_4$  of 0.7/0.3 g ( $\text{WS}_2/\text{C-I}$ ), 0.8/0.2 g ( $\text{WS}_2/\text{C-II}$ ), and 0.9/0.1 g, ( $\text{WS}_2/\text{C-III}$ ). After that, these vessels were sealed in an Ar-filled glove box and then transferred to a tube furnace, kept at 650 °C for 20 min in an Ar flow, and subsequently cooled naturally to obtain these samples. As a comparison, pure  $\text{WS}_2$  was prepared by heating only 1 g  $(\text{NH}_4)_2\text{WS}_4$  under the same conditions.

### ***Characterizations***

The microstructure and chemical composition were detected by SEM (Hitachi S-4700), TEM (FEI Talos F200x), Raman spectroscopy (Renishaw RM-1000), and XPS (Thermo Scientific Escalab 250Xi), as well as EELS (FEI, Titan Themis G2), XRD (D/max-2500/PC, Rigaku), Elemental analysis (PerkinElmer 2400 Series II) and TGA (Pyris I, PerkinElmer). The Brunauer-Emmett-Teller and Barrett-Joyner-Halenda (ASAP 2020, HD88) were employed to measure the surface area, and pore size distribution. The physical property measurement system (Quantum Design) was used to test the magnetic hysteresis curves. The TGA is tested in air atmosphere.

### ***Electrochemical measurements***

**For half cells**, the working electrodes were prepared by mixing active materials, acetylene black, and polyvinylidene fluoride (PVDF) with 8:1:1 in N-methyl

pyrrolidone solvent, which was then uniformly coated on the copper foil and dried at 85 °C for 12 h under vacuum. 2032 coin-type cells included working electrode, counter/reference electrode (sodium metal), and separator, as well as electrolyte, which were assembled in an Ar-filled glovebox. Whatman glass fiber was used as the separator. 1 M NaClO<sub>4</sub> in ethylene carbonate/dimethyl carbonate (volume ratio of 1:1) with 5% fluoroethylene-carbonate was used as electrolyte. The mass loading of active materials in each electrode slice was 1.2 mg cm<sup>-2</sup>. Neware battery-test system (Shenzhen Neware Electronic co., China) was utilized to test the electrochemical performances of cells at current densities of 0.065-13 A g<sup>-1</sup> from 0.01 and 3 V. A CHI 760D electrochemical workstation (Shanghai CH Instruments Co., China) was applied to measure CV and electrochemical impedance spectroscopy (EIS). CV was tested at a scanning rate of 0.1-1 mV s<sup>-1</sup> from 0.01 to 3 V (vs. Na/Na<sup>+</sup>). EIS was performed from 10<sup>5</sup> to 10<sup>-2</sup> Hz with an amplitude of 5 mV.

**For full cells**, the cathode was prepared by mixing 80 wt% Na<sub>3</sub>V<sub>2</sub>(PO<sub>4</sub>)<sub>2</sub>F<sub>3</sub>, 10 wt% acetylene black, and 10 wt% PVDF on Al foil. The mass ratio of anode and cathode was about 1:5. Before assembling full cells, the anode and cathode were electrochemically activated for three cycles at 0.065 A g<sup>-1</sup>, respectively, to enhance their first CE. The voltage window was 1.0 to 3.5 V. All cells were tested at room temperature.

**Computational method:** We have employed the plane-wave code Vienna ab-initio simulation package (VASP) program to perform all the spin-polarized DFT calculations within the generalized gradient approximation using the

Perdew-Burke-Ernzerhof formulation. We have chosen the projected augmented wave potentials to describe the ionic cores and take valence electrons into account using a plane-wave basis set with a kinetic energy cutoff of 500 eV. Van der Waals (vdW) interactions are included with the DFT-D3 method of Grimme. Partial occupancies of the Kohn–Sham orbitals were allowed using the Gaussian smearing method and a width of 0.02 eV. The electronic energy was considered self-consistent when the energy change was smaller than  $10^{-6}$  eV. To study the  $\text{Na}^+$  diffusion kinetics in the  $\text{WS}_2$ , diffusion barriers were determined by using the climbing image nudged elastic band (CI-NEB) method.

**Modeling description:** The equilibrium lattice constants of  $[\text{WS}_2]$  unit cell was optimized, when using a  $15 \times 15 \times 3$  Monkhorst-Pack k-point grid for Brillouin zone sampling to be  $a=b= 3.18642$ ,  $c=13.82469$  Å. We set 10.8 spacings in the c-axis direction to represent the interlayer spacings of the catalyst. The 10.86% O atom and 8.96% N atom were located in  $\text{WS}_2$  model to consider the effect of the co-doped O and N. The 6.34% O atom and 13.03% N atom were located in monolayer C model to consider the effect of the co-doped O and N. During structural optimizations of the models, a  $3 \times 3 \times 1$  gamma-point centered k-point grid for Brillouin zone was used. And all the atomic layers were allowed to fully relax.

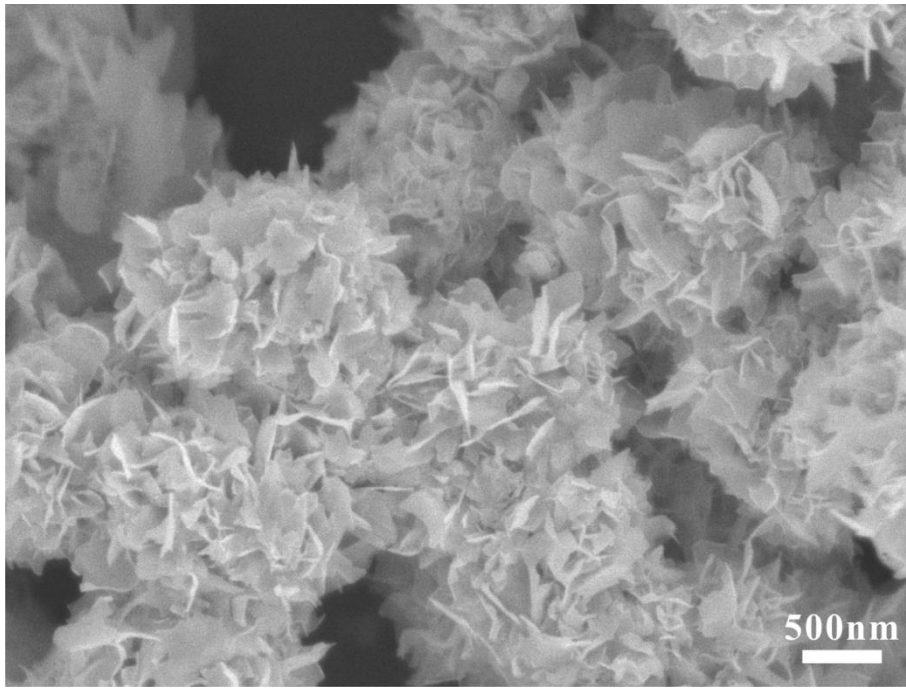

**Figure S1.** SEM image of WS<sub>2</sub>/C-I.

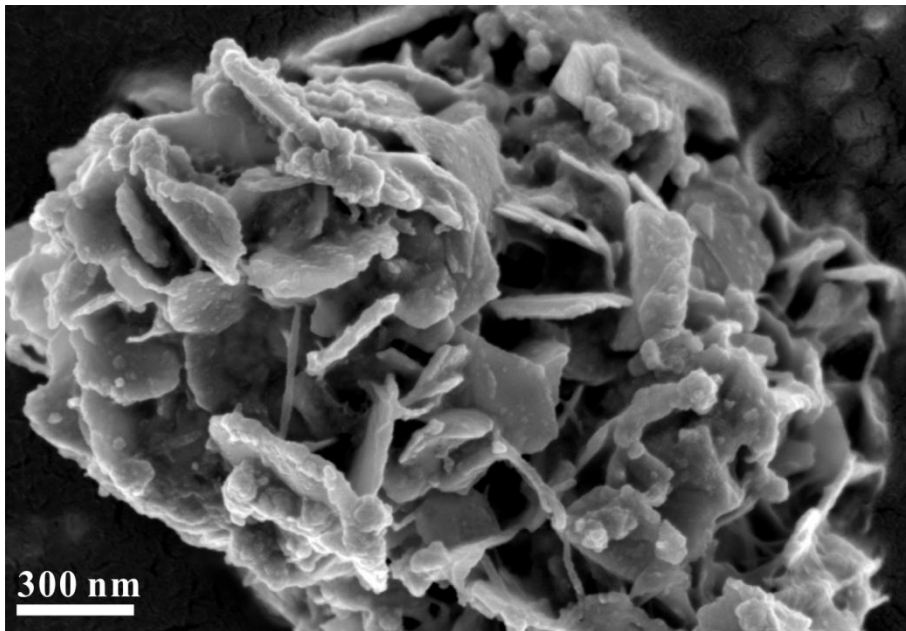

**Figure S2.** SEM image of WS<sub>2</sub>/C-III.

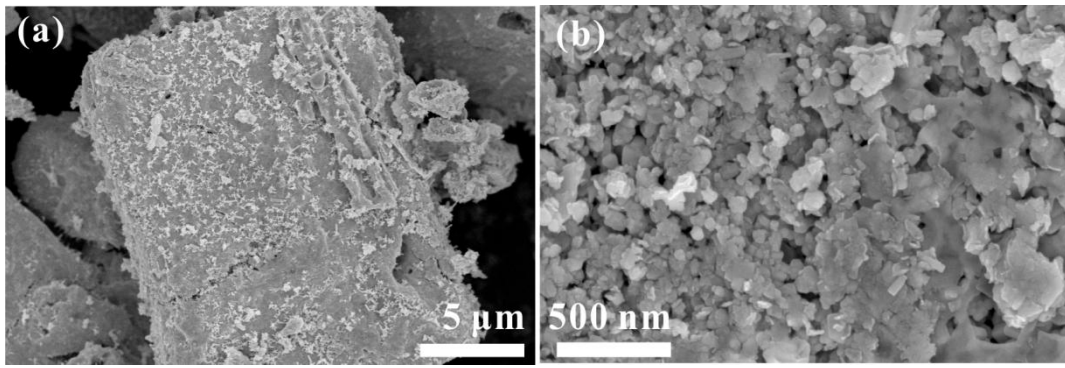

**Figure S3.** SEM images of WS<sub>2</sub>.

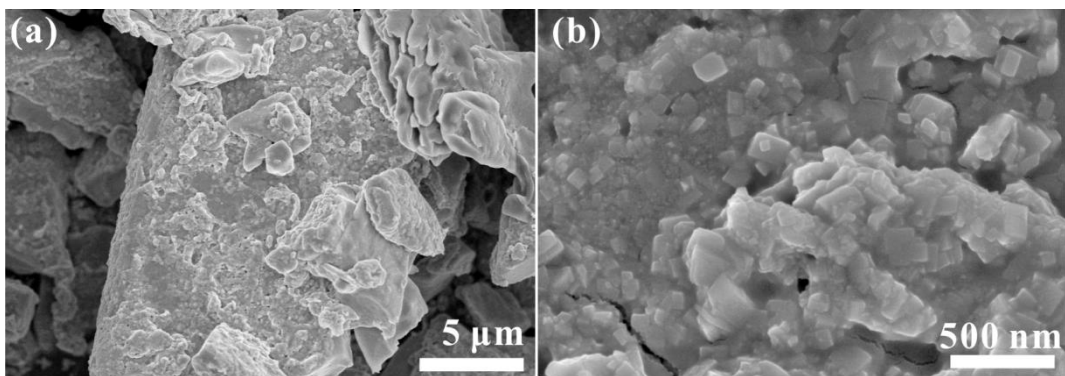

**Figure S4.** SEM images of (NH<sub>4</sub>)<sub>2</sub>WS<sub>4</sub>.

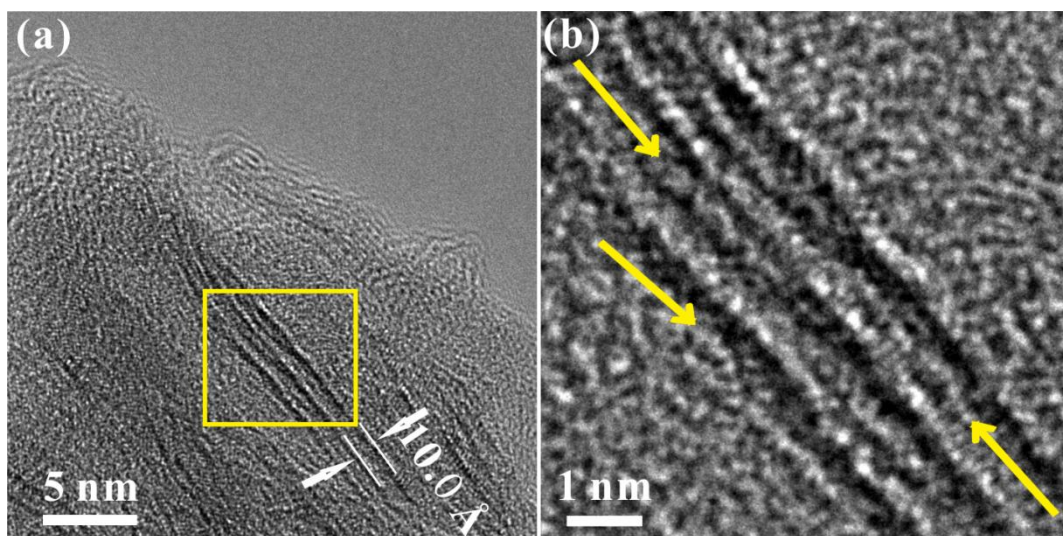

**Figure S5.** HRTEM images of WS<sub>2</sub>/C-I

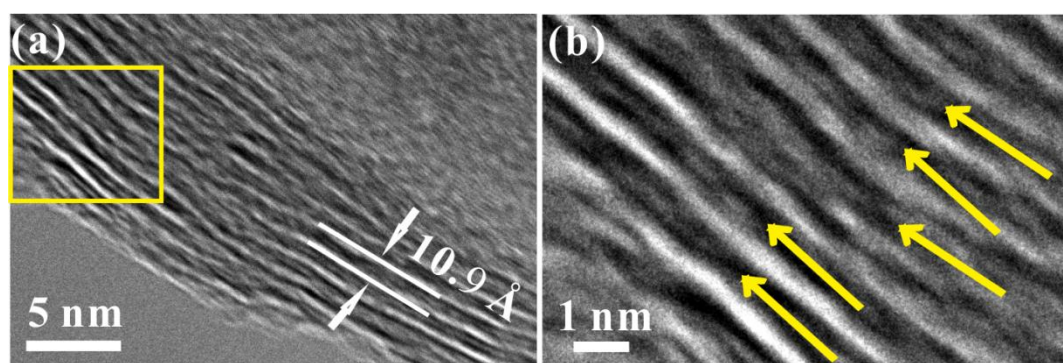

**Figure S6.** HRTEM images of WS<sub>2</sub>/C-III.

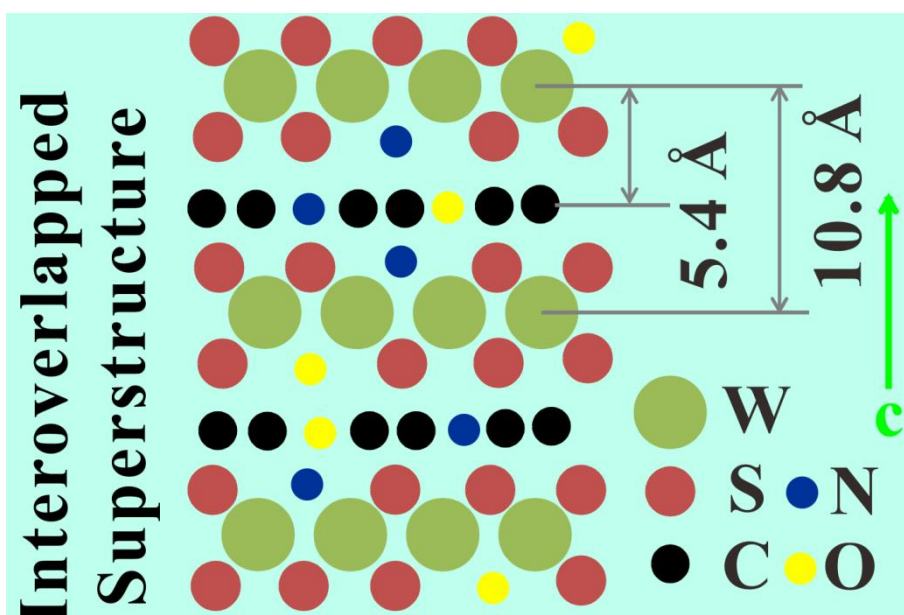

Figure S7. Schematic diagram of atomic structure of NO-WS<sub>2</sub>-C

Table S1 Fitting results of XPS spectra of all the samples.

| Samples                | W (at%) | S (at%) | C (at%) | N (at%) | O (at%) |
|------------------------|---------|---------|---------|---------|---------|
| WS <sub>2</sub>        | 32.89   | 64.90   | 0.89    | 0       | 1.32    |
| WS <sub>2</sub> /C-I   | 5.52    | 8.99    | 68.01   | 11.36   | 6.12    |
| WS <sub>2</sub> /C-II  | 4.52    | 6.31    | 69.23   | 12.51   | 7.43    |
| WS <sub>2</sub> /C-III | 3.64    | 3.90    | 70.14   | 13.69   | 8.63    |

The atomic ratio of S and W elements in the WS<sub>2</sub>, WS<sub>2</sub>/C-I, WS<sub>2</sub>/C-II and WS<sub>2</sub>/C-III is 1.97, 1.63, 1.40 and 1.07, respectively.



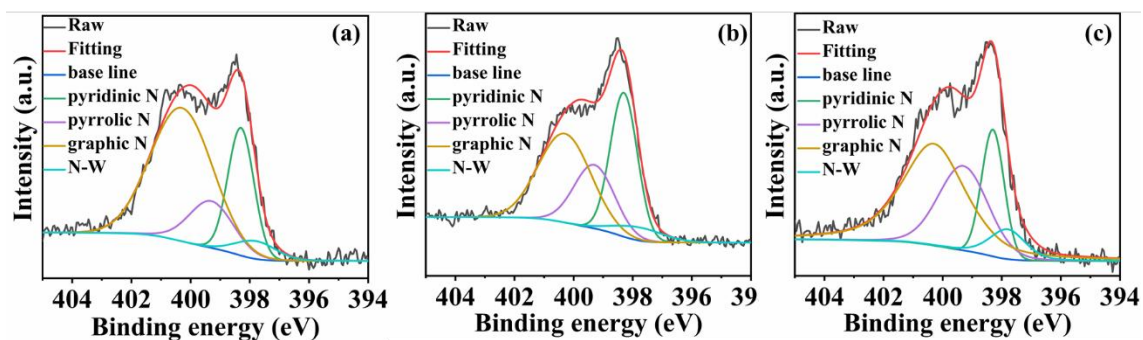

**Figure S8.** XPS spectra of N 1s of WS<sub>2</sub>/C-I (a), WS<sub>2</sub>/C-II (b), and WS<sub>2</sub>/C-III (c).

**Table S2** The percentages of various chemical bonds in N 1s.

| Samples                | N-W (%) | Pyridinic/pyrrolic/graphic N (%) |
|------------------------|---------|----------------------------------|
| WS <sub>2</sub> /C-I   | 5.49    | 94.51                            |
| WS <sub>2</sub> /C-II  | 10.06   | 89.94                            |
| WS <sub>2</sub> /C-III | 14.11   | 85.89                            |

The results are from Figure S8.

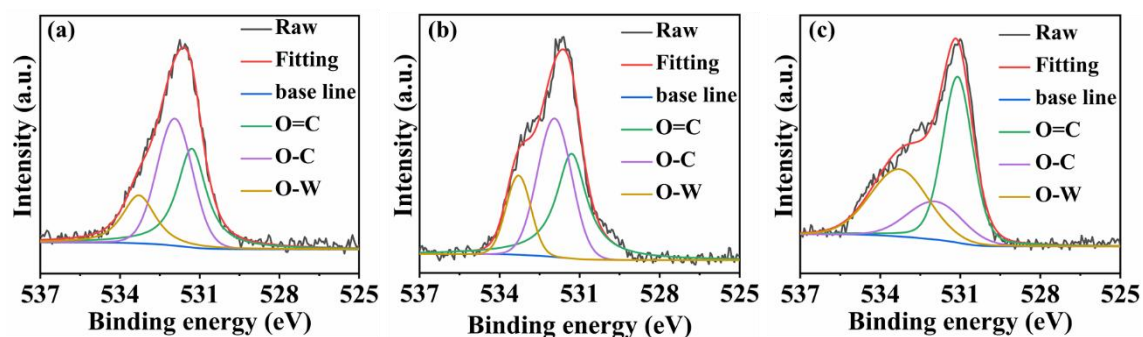

**Figure S9.** XPS spectra of O 1s of WS<sub>2</sub>/C-I (a), WS<sub>2</sub>/C-II (b), and WS<sub>2</sub>/C-III (c).

**Table S3** The percentages of various chemical bonds in O 1s.

| Samples                | O-W (%) | C-O/C=O (%) |
|------------------------|---------|-------------|
| WS <sub>2</sub> /C-I   | 13.09   | 86.91       |
| WS <sub>2</sub> /C-II  | 20.78   | 79.22       |
| WS <sub>2</sub> /C-III | 28.27   | 71.73       |

The results are from Figure S9.

**Table S4** EC of the obtained samples

| Samples                | EC (S/cm)            |
|------------------------|----------------------|
| WS <sub>2</sub>        | 2.1x10 <sup>-4</sup> |
| WS <sub>2</sub> /C-I   | 23.2                 |
| WS <sub>2</sub> /C-II  | 37.4                 |
| WS <sub>2</sub> /C-III | 40.5                 |

**Electrical conductivity measurements**

First, the obtained powders were added in a hollow cylinder mould with two electrodes on each ends, which were connected with a digital multimeter (Keithley 2001, USA) and followed by compressing powders into slices. During compressing, the electrical resistance was observed constantly. When the electrical resistance kept stable, the sample slices were obtained. Subsequently, the electrical conductivity of slices was measured using a four-probe tester (Probes Tech RTS-8, China)

The doping amount of N and O elements in the carbon materials was calculated by  $\text{Pyridinic/pyrrolic/graphic N (\%)*N (at\%)/(C (at\%)+Pyridinic/pyrrolic/graphic N (\%)*N (at\%)+C-O/C=O (\%)*O (at\%))*100\%$  and  $\text{C-O/C=O (\%)*O (at\%)/(C (at\%)+Pyridinic/pyrrolic/graphic N (\%)*N (at\%)+C-O/C=O (\%)*O (at\%))*100\%$ , respectively. The specific doping amount was represented in **Table S5**.

**Table S5** The doping amount of N and O elements in the carbon materials

| Samples                | N (at%) | O (at%) |
|------------------------|---------|---------|
| WS <sub>2</sub> /C-I   | 12.83   | 5.92    |
| WS <sub>2</sub> /C-II  | 13.03   | 6.34    |
| WS <sub>2</sub> /C-III | 13.34   | 6.48    |

The doping amount of N and O elements in the WS<sub>2</sub> materials should be calculated by  $N\text{-W}(\%) * N(\text{at}\%) / [W(\text{at}\%) + S(\text{at}\%) + N\text{-W}(\%) * N(\text{at}\%) + O\text{-W}(\%) * O(\text{at}\%)] * 100\%$  and  $O\text{-W}(\%) * O(\text{at}\%) / [W(\text{at}\%) + S(\text{at}\%) + N\text{-W}(\%) * N(\text{at}\%) + O\text{-W}(\%) * O(\text{at}\%)] * 100\%$ , respectively. The specific doping amount is represented in **Table S6**.

**Table S6** The doping amount of N and O elements in the WS<sub>2</sub> materials

| Samples                | N (at%) | O (at%) |
|------------------------|---------|---------|
| WS <sub>2</sub> /C-I   | 4.05    | 5.98    |
| WS <sub>2</sub> /C-II  | 8.96    | 10.86   |
| WS <sub>2</sub> /C-III | 14.21   | 16.79   |

**Table S7** The elemental analysis results of the obtained samples.

| Samples                | C (wt%) | N (wt%) | O (wt%) | WS <sub>2</sub> (wt%) |
|------------------------|---------|---------|---------|-----------------------|
| WS <sub>2</sub> /C-I   | 11.25   | 3.31    | 1.88    | 83.56                 |
| WS <sub>2</sub> /C-II  | 18.43   | 5.42    | 3.97    | 72.18                 |
| WS <sub>2</sub> /C-III | 28.99   | 7.58    | 4.64    | 58.79                 |

The C, N, and O contents in the composites were measured using O/N/H and C/S elemental analyzers. The content of WS<sub>2</sub> was calculated as a difference to 100 wt%.

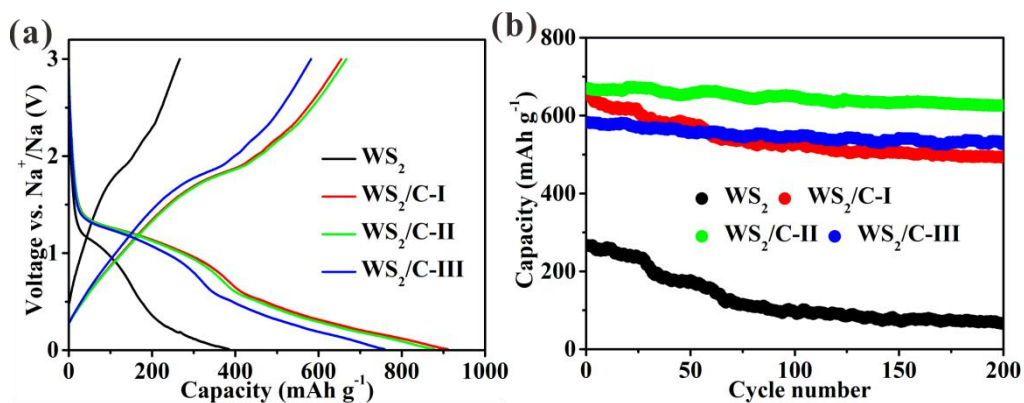

**Figure S10** (a) First charge and discharge curves, and (b) cycling performances at  $0.065 \text{ A g}^{-1}$  of the as-prepared samples.

**Table S8** The charge capacity and charge capacity retention after 200 cycles of the obtained samples.

| Samples                    | First capacity ( $\text{mAh g}^{-1}$ ) | Final capacity ( $\text{mAh g}^{-1}$ ) | Capacity retention (%) |
|----------------------------|----------------------------------------|----------------------------------------|------------------------|
| $\text{WS}_2$              | 266.2                                  | 65.7                                   | 24.7                   |
| $\text{WS}_2/\text{C-I}$   | 655.3                                  | 494.5                                  | 75.5                   |
| $\text{WS}_2/\text{C-II}$  | 669.2                                  | 661.8                                  | 98.9                   |
| $\text{WS}_2/\text{C-III}$ | 582.8                                  | 554.6                                  | 95.2                   |

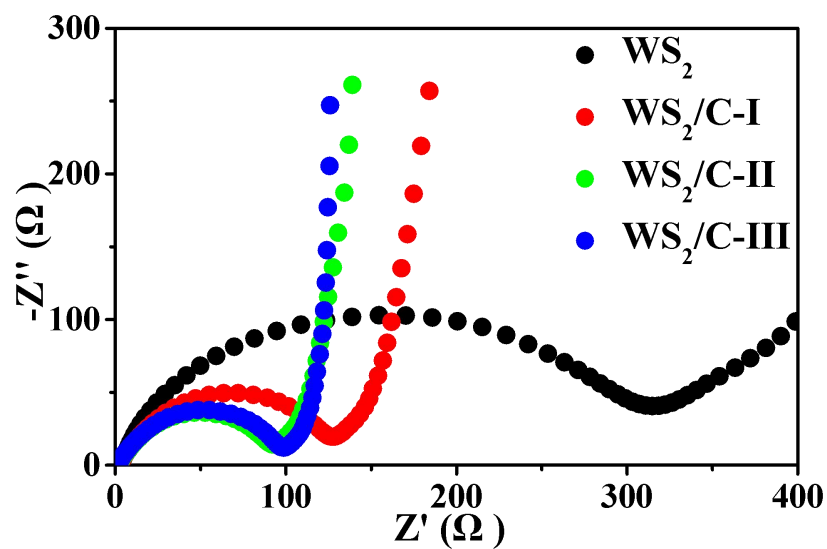

Figure S11. Nyquist plots of the obtained samples before cycling.

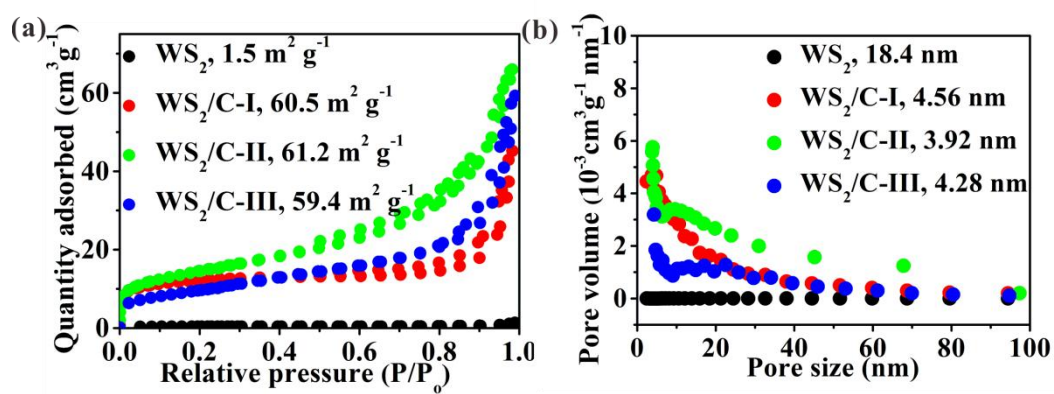

Figure S12. (a) Nitrogen adsorption/desorption isotherms and (b) pore size distribution of the obtained samples.

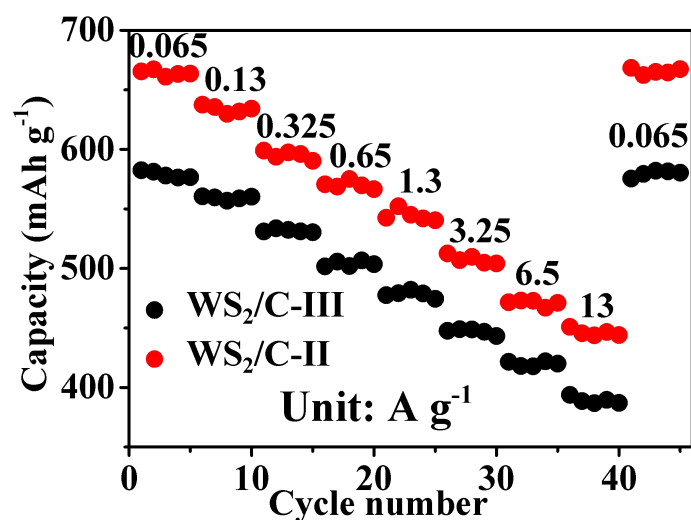

**Figure S13.** The comparison of rate capability between WS<sub>2</sub>/C-II and WS<sub>2</sub>/C-III electrodes.

The capacity of WS<sub>2</sub>/C-II is 665.5 and 450.8 mAh g<sup>-1</sup> at 0.065 and 13 A g<sup>-1</sup>, respectively. The capacity obtained at 13 A g<sup>-1</sup> maintains 67.7% of the capacity obtained at 0.065 A g<sup>-1</sup>. The capacity of WS<sub>2</sub>/C-III is 582.5 and 389.6 mAh g<sup>-1</sup> at 0.065 and 13 A g<sup>-1</sup>, respectively. The capacity obtained at 13 A g<sup>-1</sup> maintains 66.9% of the capacity obtained at 0.065 A g<sup>-1</sup>. The results indicate that the WS<sub>2</sub>/C-II has higher capacity and corresponding higher capacity retention at high rate test than that of the WS<sub>2</sub>/C-III.

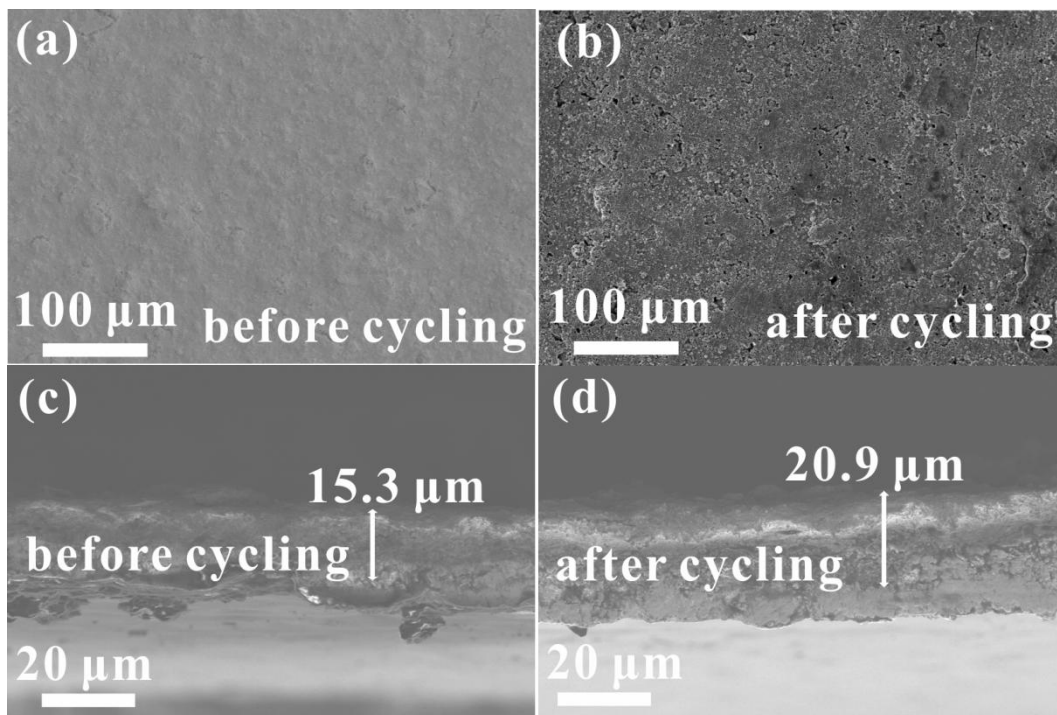

**Figure S14** SEM images of WS<sub>2</sub>/C-II electrodes before and after 200 cycling.

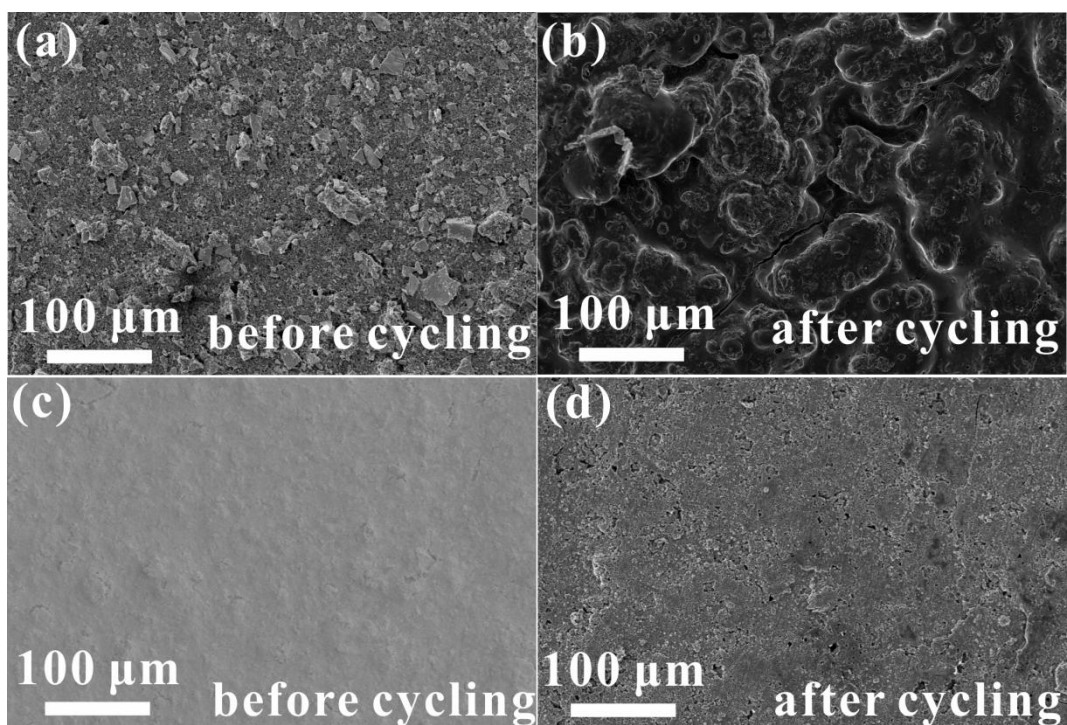

**Figure S15.** Surface SEM images of pure WS<sub>2</sub> (a,b) and WS<sub>2</sub>/C-II (c,d) electrodes before and after cycling.

**Table S9.** Comparison of the initial CE of the WS<sub>2</sub> or nanocomposites of WS<sub>2</sub> and carbon materials as anodes for SIBs with our work.

| <b>Samples</b>              | <b>Initial CE</b> | <b>Reference</b>                     |
|-----------------------------|-------------------|--------------------------------------|
| <b>WS<sub>2</sub>/C-II</b>  | <b>76.2%</b>      | <b>This work</b>                     |
| H-WS <sub>2</sub> @NC       | 67.7%             | Adv. Funct. Mater. 2020, 30, 1907677 |
| WS <sub>2</sub> nanoflakes  | 55.8%             | Sustain. Energy Fuels 2019, 3, 1239. |
| WS <sub>2</sub> /rGO        | 52.1%             | Carbon 2019, 142, 697.               |
| NGQDs-WS <sub>2</sub> /3DCF | 55.2%             | J. Mater. Chem. A 2018, 6, 10813.    |
| WS <sub>2</sub> /NC         | 62.5%             | Front. Chem. 2018, 6, 236.           |
| WS <sub>2</sub> /CNT-rGO    | 33.9%             | Adv. Energy Mater. 2016, 6, 1601057. |
| WS <sub>2</sub> nanowires   | 67.6%             | Chem. Eur. J. 2015, 21, 11878.       |
| WS <sub>2</sub> -3D RGO     | 56%               | Nanoscale 2015, 7, 3965              |



**Table S10** The specific references about capacity comparison of WS<sub>2</sub>-based SIB anodes after long cycling under high current densities from Figure 4h in the manuscript. C<sub>C</sub>-charge capacity (mAh g<sup>-1</sup>) after cycling, J-current density (A g<sup>-1</sup>), N<sub>C</sub>-cycle number.

| Samples                                              | C <sub>C</sub> | J          | N <sub>C</sub> | References                              |
|------------------------------------------------------|----------------|------------|----------------|-----------------------------------------|
| <b>WS<sub>2</sub>/C-II</b>                           | <b>518.2</b>   | <b>1.3</b> | <b>3000</b>    | <b>This work</b>                        |
| <b>WS<sub>2</sub>/C-II</b>                           | <b>378.3</b>   | <b>6.5</b> | <b>3000</b>    | <b>This work</b>                        |
| FeS <sub>2</sub> /WS <sub>2</sub> -CNFs              | 307.6          | 4          | 1000           | Chem. Eng. J. 427 (2022) 131002         |
| H-WS <sub>2</sub> @NC                                | 375            | 1          | 1000           | Adv. Funct. Mater. 30 (2020) 1907677    |
| WS <sub>2</sub> /CFC@C-P                             | 297            | 2          | 500            | Chem. Eng. J. 411 (2021) 128554         |
| 1T W <sub>0.9</sub> Mo <sub>0.1</sub> S <sub>2</sub> | 411            | 0.1        | 180            | J. Energy Chemistry 66 (2022) 356-365   |
| WS <sub>2</sub> @NC                                  | 150            | 5          | 500            | J. Mater. Chem. A, 5 (2017) 10406-10415 |
| NGQDs-WS <sub>2</sub> /3DCF                          | 392.1          | 0.2        | 1000           | J. Mater. Chem. A, 6 (2018) 10813-10824 |
| HB WS <sub>2</sub> @CNFs                             | 343            | 2          | 300            | Small, 16 (2020) 2000695                |
| WS <sub>2</sub> Nanowires                            | 370            | 1          | 1400           | Chem. Eur. J. 21 (2015) 11878-11884     |

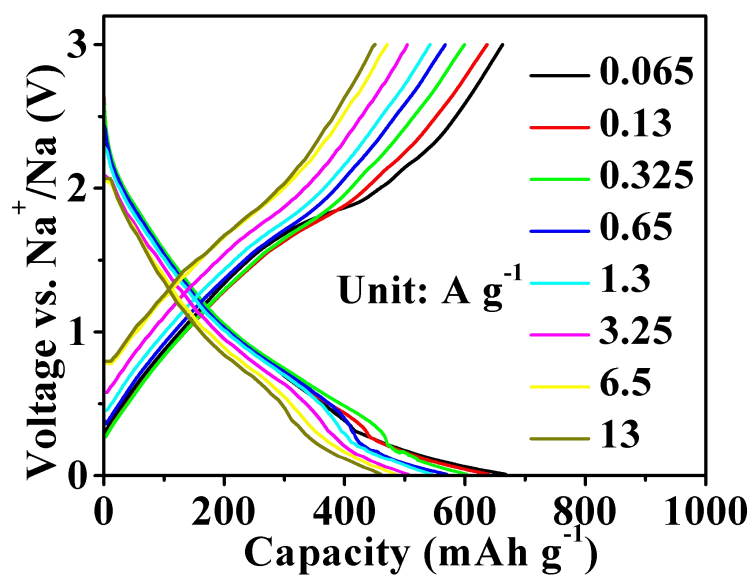

**Figure S16.** Charge/discharge curves at different current densities of WS<sub>2</sub>/C-II

**Table S11** The specific references about comparison of rate performances of WS<sub>2</sub>-based SIB anodes from Figure 4i in the manuscript.

| Samples                                              | References                              |
|------------------------------------------------------|-----------------------------------------|
| <b>WS<sub>2</sub>/C-II</b>                           | <b>This work</b>                        |
| FeS <sub>2</sub> /WS <sub>2</sub> -CNFs              | Chem. Eng. J. 427 (2022) 131002         |
| H-WS <sub>2</sub> @NC                                | Adv. Funct. Mater. 30 (2020) 1907677    |
| WS <sub>2</sub> /CFC@C-P                             | Chem. Eng. J. 411 (2021) 128554         |
| 1T W <sub>0.9</sub> Mo <sub>0.1</sub> S <sub>2</sub> | J. Energy Chemistry 66 (2022) 356-365   |
| WS <sub>2</sub> /CNT-rGO Aerogel                     | Adv. Energy Mater. 6 (2016) 1601057     |
| NGQDs-WS <sub>2</sub> /3DCF                          | J. Mater. Chem. A, 6 (2018) 10813–10824 |
| HB WS <sub>2</sub> @CNFs                             | Small, 16 (2020) 2000695                |

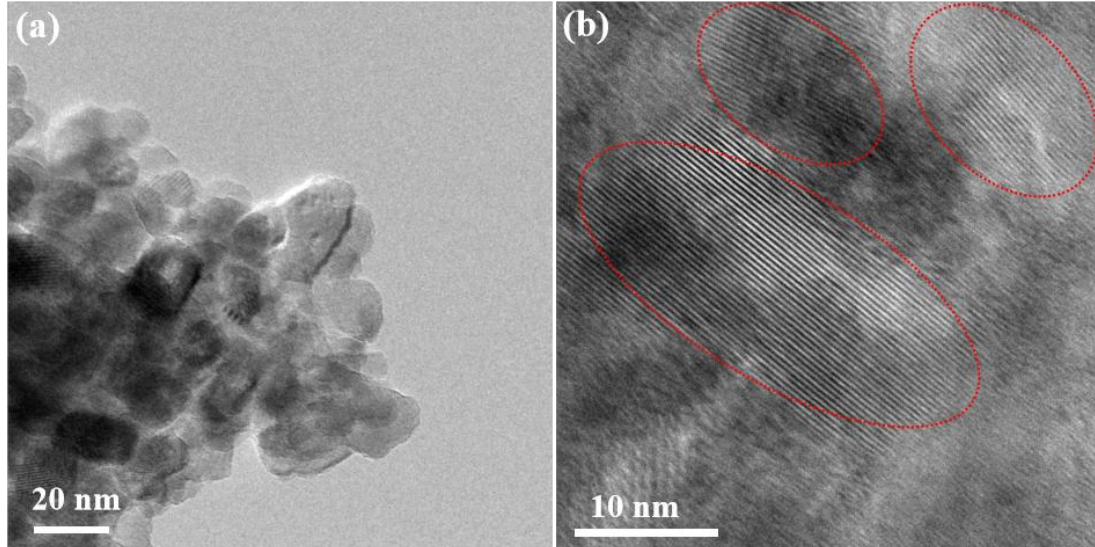

**Figure S17. TEM images of pure WS<sub>2</sub> electrode after discharging to 0.01 V.**

### Na-Ion Concentration Calculation

At first, the unit cell volume of WS<sub>2</sub> is calculated to be “a (3.15 Å) × b (3.15 Å) × c (12.27 Å) × sin120° = 105.44 × 10<sup>-24</sup> cm<sup>3</sup>”, thus 1 cm<sup>3</sup> includes 1/105.44 × 10<sup>-24</sup> = 9.48 × 10<sup>21</sup> unit cells. The charge capacities of WS<sub>2</sub>/C-I, WS<sub>2</sub>/C-II, and WS<sub>2</sub>/C-III can reach 655.3, 669.2, and 582.8 mAh g<sup>-1</sup>, respectively during the initial cycling, corresponding to 1.52, 1.55, and 1.35 Na<sup>+</sup> insertion into WS<sub>2</sub> per formula unit to form the Na<sub>1.52</sub>WS<sub>2</sub>, Na<sub>1.55</sub>WS<sub>2</sub>, and Na<sub>1.35</sub>WS<sub>2</sub>, respectively. In addition, every WS<sub>2</sub> unit cell includes two molecules, and each molecule includes 1.52, 1.55, and 1.35 Na-ions, 1 cm<sup>3</sup> contains 9.48 × 10<sup>21</sup>/(6.02 × 10<sup>23</sup>) × 2 × 1.55 = 4.79 × 10<sup>-2</sup>, 4.88 × 10<sup>-2</sup>, and 4.25 × 10<sup>-2</sup> mol Na-ions for WS<sub>2</sub>/C-I, WS<sub>2</sub>/C-II, and WS<sub>2</sub>/C-III, respectively. As a result, the Na-ion concentration in the WS<sub>2</sub>/C-I, WS<sub>2</sub>/C-II, and WS<sub>2</sub>/C-III electrode is about 4.79 × 10<sup>-2</sup>, 4.88 × 10<sup>-2</sup>, and 4.25 × 10<sup>-2</sup> mol cm<sup>-3</sup>, respectively.

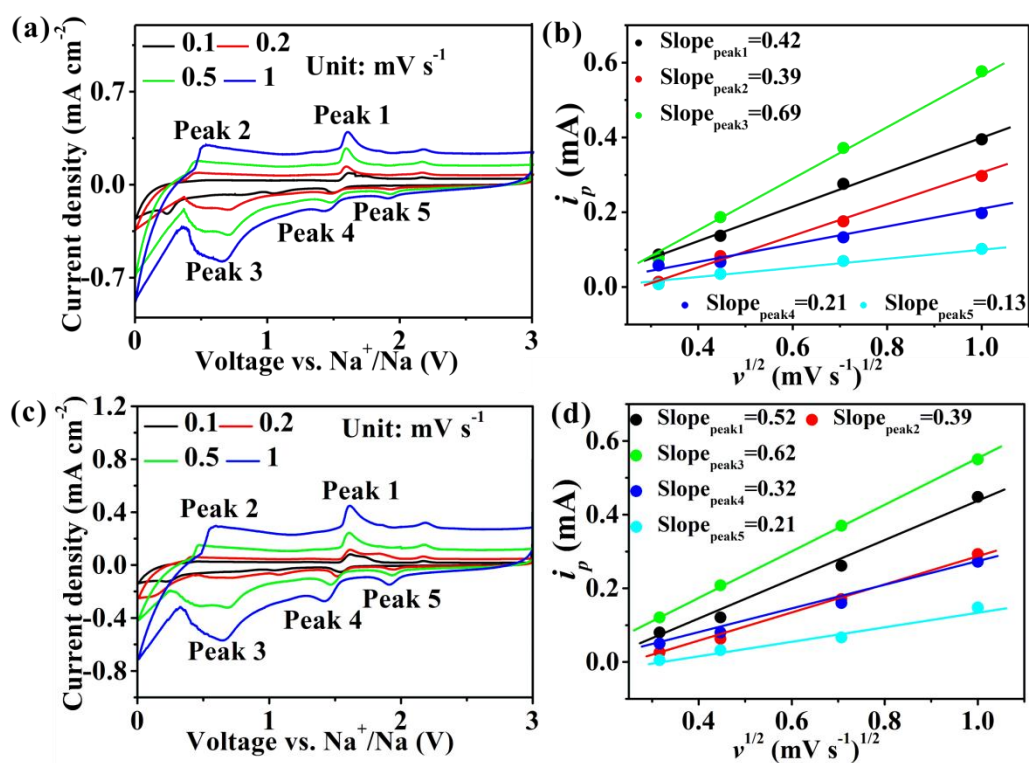

**Figure S18.** Kinetic analysis of WS<sub>2</sub>/C-I (a,b) and WS<sub>2</sub>/C-III (c,d). (a,c) CV curves from 0.1 to 1 mV s<sup>-1</sup>; (b,d) Linear relationship between  $i_p$  and  $v^{1/2}$ .

**Table S12** The specific references about comparison of  $D_{Na^+}$  ( $\text{cm}^2 \text{s}^{-1}$ ) values of our WS<sub>2</sub>/C-II and recently reported anode materials for SIBs.

| Samples                                              | $D_{Na^+}$                              | References                             |
|------------------------------------------------------|-----------------------------------------|----------------------------------------|
| <b>WS<sub>2</sub>/C-II</b>                           | <b><math>1.50 \times 10^{-9}</math></b> | <b>This work</b>                       |
| bare WS <sub>2</sub>                                 | $2.42 \times 10^{-15}$                  | Adv. Funct. Mater. 30 (2020) 1907677   |
| S-WS <sub>2</sub> @NC                                | $5.29 \times 10^{-14}$                  | Adv. Funct. Mater. 30 (2020) 1907677   |
| H-WS <sub>2</sub> @NC                                | $8.23 \times 10^{-13}$                  | Adv. Funct. Mater. 30 (2020) 1907677   |
| Vertical WS <sub>2</sub> /C                          | $2.14 \times 10^{-10}$                  | J. Mater. Chem. A 7 (2019) 25985-25992 |
| FeS <sub>2</sub> /WS <sub>2</sub> -CNFs              | $1.12 \times 10^{-14}$                  | Chem. Eng. J. 427 (2022) 131002        |
| WS <sub>2</sub> /CFC@C-P                             | $5.25 \times 10^{-12}$                  | Chem. Eng. J. 411 (2021) 128554        |
| WS <sub>2</sub> /CFC                                 | $5.25 \times 10^{-13}$                  | Chem. Eng. J. 411 (2021) 128554        |
| 1T W <sub>0.9</sub> Mo <sub>0.1</sub> S <sub>2</sub> | $7 \times 10^{-10}$                     | J. Energy Chemistry 66 (2022) 356-365  |

**Table S13.** The comparison of electrochemical performances for the full cells.

| Samples                                              | Current density              | Specific capacity (mAh g <sup>-1</sup> ) | The capacity is calculated based on | References                              |
|------------------------------------------------------|------------------------------|------------------------------------------|-------------------------------------|-----------------------------------------|
| <b>WS<sub>2</sub>/C-II</b>                           | <b>1.95 A g<sup>-1</sup></b> | <b>429.6 after 300 cycles</b>            | <b>anode</b>                        | <b>This work</b>                        |
| VA/LT-WS <sub>2</sub> /C                             | 0.05 A g <sup>-1</sup>       | 133 after 50 cycles                      | anode                               | Energy Storage Mater. 26 (2020) 534-542 |
| WS <sub>2-x</sub> /ZnS@C                             | 1 A g <sup>-1</sup>          | 89 after 500 cycles                      | anode                               | Adv. Mater. 32 (2020) 2005802           |
| H-WS <sub>2</sub> @NC                                | 0.5 A g <sup>-1</sup>        | 296 after 200 cycles                     | anode                               | Adv. Funct. Mater. 30 (2020) 1907677    |
| 1T W <sub>0.9</sub> Mo <sub>0.1</sub> S <sub>2</sub> | 1 A g <sup>-1</sup>          | 143 after 50 cycles                      | anode                               | J. Energy Chemistry 66 (2022) 356-365   |
